# Supplementary material for: A characteristic cerebellar biosignature for bipolar disorder, identified with fully automatic machine learning
Source: bioRxiv or medRxiv preprint supplement (doi:10.1101/2022.01.22.22269384), 2023-01-06
Supplement: Supplementary file [file media-1.pdf]

## Supplementary Information

### **A characteristic cerebellar biosignature for bipolar disorder, identified with fully automatic machine learning.**

1. Georgios V. Thomaidis, MD <sup>1\*</sup>, 2. Konstantinos Papadimitriou MD <sup>2</sup>, 3. Sotirios Michos PhD <sup>3</sup>, 4. Evangelos Chartampilas MD <sup>4</sup>, 5. Prof. Ioannis Tsamardinos PhD <sup>2</sup>.

1. Greek National Health System, Psychiatric Department, Katerini General Hospital, Katerini, Greece, 2. Greek National Health System, G. Papanikolaou General Hospital, Organizational Unit - Psychiatric Hospital of Thessaloniki, Thessaloniki, Greece, 3. Department of Computer Science, University of Crete, Heraclion, Greece, 4. Laboratory of Radiology, AHEPA General Hospital, University of Thessaloniki, Thessaloniki, Greece

#### **\*Corresponding author**

#### **Abstract**

**Background:** Transcriptomic profile differences between patients with bipolar disorder and healthy controls can be identified using machine learning and can provide information about the potential role of the cerebellum in the pathogenesis of bipolar disorder. With this aim, user-friendly, fully automated machine learning algorithms can achieve extremely high classification scores and disease-related predictive biosignature identification, in short time frames and scaled down to small datasets.

**Method:** A fully automated machine learning platform, based on the most suitable algorithm selection and relevant set of hyper-parameter values, was applied on a preprocessed transcriptomics dataset, in order to produce a model for biosignature selection and to classify subjects into groups of patients and controls. The parent GEO datasets were originally produced from the cerebellar and parietal lobe tissue of deceased bipolar patients and healthy controls, using Affymetrix Human Gene 1.0 ST Array.

**Results:** Patients and controls were classified into two separate groups, with no close-to-the-boundary cases, and this classification was based on the cerebellar transcriptomic biosignature of 25 features (genes), with Area Under Curve 0.929 and Average Precision 0.955. Using 6 of the characteristic features (genes) discovered during the selection process, 99.6% of predictive performance was achieved. The 3 genes contributing most to the predictive power of the model (92.7% predictive performance) are also deregulated in temporal lobe epilepsy. KEGG analysis revealed participation of 4 identified features in 6 pathways which have been associated with bipolar disorder.

**Conclusion:** 93% Area Under Curve, 96% Average Precision, and complete separation between unaffected controls and patients with bipolar disorder, were achieved in ~2 hours. The cerebellar transcriptomic biosignature suggests a potential genetic overlap with temporal lobe epilepsy and new genetic contributions to the pathogenesis of bipolar disorder.

#### **Keywords**

Bipolar, Disorder, Temporal, Lobe, Epilepsy, RNU6-576P, AutoML, Machine, Learning, Psychiatry

A. Information about the GSE35974 and GSE35978 and BioDataome datasets and studies produced.

Original Dataset :

Expression data from the human cerebellum and parietal cortex brain.

Gene Expression Omnibus Accession Viewer link for GSE35974

<https://www.ncbi.nlm.nih.gov/geo/query/acc.cgi?acc=GSE35974>

Gene Expression omnibus Accession Viewer link for GSE35978:

<https://www.ncbi.nlm.nih.gov/geo/query/acc.cgi?acc=GSE35978>

Protocol Information for GSE35974

<https://www.ebi.ac.uk/arrayexpress/experiments/E-GEOD-35974/protocols/>

Protocol Information for GSE35978

<https://www.ebi.ac.uk/arrayexpress/experiments/E-GEOD-35978/protocols/>

### Full Subject list for GSE35978

[https://www.ebi.ac.uk/arrayexpress/experiments/E-GEOD-35978/samples/?s\\_page=1&s\\_pagesize=500&s\\_sortby=col\\_12&s\\_sortorder=ascending](https://www.ebi.ac.uk/arrayexpress/experiments/E-GEOD-35978/samples/?s_page=1&s_pagesize=500&s_sortby=col_12&s_sortorder=ascending)

BioDataome Processed Dataset

<http://dataome.mensxmachina.org/data/Homo%20sapiens/GPL6244/GSE35978.csv>

BioDataome Process Documentation:

<http://dataome.mensxmachina.org/docs>

| 1A - Unaffected (male) |             |      |     |            |
|------------------------|-------------|------|-----|------------|
| No                     | Sample ID   | Sex  | Age | Diagnosis  |
| 1                      | GSM878305 1 | male | 30  | unaffected |
| 2                      | GSM878293 1 | male | 30  | unaffected |
| 3                      | GSM878275 1 | male | 30  | unaffected |
| 4                      | GSM878257 1 | male | 35  | unaffected |
| 5                      | GSM878252 1 | male | 35  | unaffected |
| 6                      | GSM878239 1 | male | 35  | unaffected |
| 7                      | GSM878337 1 | male | 40  | unaffected |
| 8                      | GSM878300 1 | male | 40  | unaffected |
| 9                      | GSM878261 1 | male | 40  | unaffected |
| 10                     | GSM878295 1 | male | 45  | unaffected |
| 11                     | GSM878294 1 | male | 45  | unaffected |
| 12                     | GSM878268 1 | male | 45  | unaffected |
| 13                     | GSM878259 1 | male | 45  | unaffected |
| 14                     | GSM878258 1 | male | 45  | unaffected |
| 15                     | GSM878221 1 | male | 45  | unaffected |
| 16                     | GSM878321 1 | male | 50  | unaffected |
| 17                     | GSM878310 1 | male | 50  | unaffected |
| 18                     | GSM878309 1 | male | 50  | unaffected |
| 19                     | GSM878306 1 | male | 50  | unaffected |
| 20                     | GSM878301 1 | male | 50  | unaffected |
| 21                     | GSM878290 1 | male | 50  | unaffected |
| 22                     | GSM878288 1 | male | 50  | unaffected |
| 23                     | GSM878273 1 | male | 50  | unaffected |
| 24                     | GSM878240 1 | male | 50  | unaffected |
| 25                     | GSM878230 1 | male | 50  | unaffected |
| 26                     | GSM878338 1 | male | 55  | unaffected |
| 27                     | GSM878280 1 | male | 55  | unaffected |
| 28                     | GSM878242 1 | male | 55  | unaffected |
| 29                     | GSM878236 1 | male | 55  | unaffected |
| 30                     | GSM878336 1 | male | 60  | unaffected |
| 31                     | GSM878322 1 | male | 60  | unaffected |

| 1B - Unaffected (female) |             |        |     |            |
|--------------------------|-------------|--------|-----|------------|
| No                       | Sample ID   | Sex    | Age | Diagnosis  |
| 1                        | GSM878354 1 | female | 30  | unaffected |
| 2                        | GSM878353 1 | female | 30  | unaffected |
| 3                        | GSM878314 1 | female | 35  | unaffected |
| 4                        | GSM878313 1 | female | 35  | unaffected |
| 5                        | GSM878286 1 | female | 35  | unaffected |
| 6                        | GSM878260 1 | female | 35  | unaffected |
| 7                        | GSM878307 1 | female | 40  | unaffected |
| 8                        | GSM878245 1 | female | 40  | unaffected |
| 9                        | GSM878347 1 | female | 45  | unaffected |
| 10                       | GSM878263 1 | female | 45  | unaffected |
| 11                       | GSM878226 1 | female | 45  | unaffected |
| 12                       | GSM878281 1 | female | 50  | unaffected |
| 13                       | GSM878335 1 | female | 55  | unaffected |
| 14                       | GSM878334 1 | female | 55  | unaffected |
| 15                       | GSM878333 1 | female | 55  | unaffected |
| 16                       | GSM878332 1 | female | 55  | unaffected |
| 17                       | GSM878331 1 | female | 55  | unaffected |
| 18                       | GSM878330 1 | female | 55  | unaffected |
| 19                       | GSM878345 1 | female | 70  | unaffected |

Images 1A – 1B. Preliminary GSE35978 dataset with 50 unaffected subjects.

| 1 – C Bipolar (male) |             |      |     |           | 1 – D Bipolar (female) |             |        |     |           |
|----------------------|-------------|------|-----|-----------|------------------------|-------------|--------|-----|-----------|
| No                   | Sample ID   | Sex  | Age | Diagnosis | No                     | Sample ID   | Sex    | Age | Diagnosis |
| 1                    | GSM878222 1 | male | 20  | bipolar   | 1                      | GSM878344 1 | female | 25  | bipolar   |
| 2                    | GSM878348 1 | male | 30  | bipolar   | 2                      | GSM878267 1 | female | 30  | bipolar   |
| 3                    | GSM878311 1 | male | 30  | bipolar   | 3                      | GSM878284 1 | female | 35  | bipolar   |
| 4                    | GSM878231 1 | male | 30  | bipolar   | 4                      | GSM878235 1 | female | 35  | bipolar   |
| 5                    | GSM878214 1 | male | 30  | bipolar   | 5                      | GSM878243 1 | female | 40  | bipolar   |
| 6                    | GSM878356 1 | male | 35  | bipolar   | 6                      | GSM878298 1 | female | 45  | bipolar   |
| 7                    | GSM878272 1 | male | 35  | bipolar   | 7                      | GSM878271 1 | female | 45  | bipolar   |
| 8                    | GSM878229 1 | male | 35  | bipolar   | 8                      | GSM878269 1 | female | 45  | bipolar   |
| 9                    | GSM878227 1 | male | 40  | bipolar   | 9                      | GSM878339 1 | female | 50  | bipolar   |
| 10                   | GSM878289 1 | male | 45  | bipolar   | 10                     | GSM878282 1 | female | 50  | bipolar   |
| 11                   | GSM878248 1 | male | 45  | bipolar   | 11                     | GSM878278 1 | female | 50  | bipolar   |
| 12                   | GSM878329 1 | male | 50  | bipolar   | 12                     | GSM878225 1 | female | 50  | bipolar   |
| 13                   | GSM878326 1 | male | 50  | bipolar   | 13                     | GSM878270 1 | female | 55  | bipolar   |
| 14                   | GSM878264 1 | male | 50  | bipolar   | 14                     | GSM878325 1 | female | 60  | bipolar   |
| 15                   | GSM878220 1 | male | 50  | bipolar   | 15                     | GSM878244 1 | female | 60  | bipolar   |
| 16                   | GSM878342 1 | male | 55  | bipolar   | 16                     | GSM878232 1 | female | 60  | bipolar   |
| 17                   | GSM878233 1 | male | 55  | bipolar   | 17                     | GSM878266 1 | female | 65  | bipolar   |
| 18                   | GSM878255 1 | male | 60  | bipolar   | 18                     | GSM878265 1 | female | 65  | bipolar   |
| 19                   | GSM878251 1 | male | 65  | bipolar   |                        |             |        |     |           |

Images 1C – 1D. Preliminary GSE35978 dataset with 37 bipolar disorder patients.

| 2A - Unaffected (male) |             |      |     |            | 2B - Unaffected (female) |             |        |     |            |
|------------------------|-------------|------|-----|------------|--------------------------|-------------|--------|-----|------------|
| No                     | Sample ID   | Sex  | Age | Diagnosis  | No                       | Sample ID   | Sex    | Age | Diagnosis  |
| 1                      | GSM878305 1 | male | 30  | unaffected | 1                        | GSM878354 1 | female | 30  | unaffected |
| 2                      | GSM878293 1 | male | 30  | unaffected | 2                        | GSM878353 1 | female | 30  | unaffected |
| 3                      | GSM878275 1 | male | 30  | unaffected | 3                        | GSM878314 1 | female | 35  | unaffected |
| 4                      | GSM878257 1 | male | 35  | unaffected | 4                        | GSM878313 1 | female | 35  | unaffected |
| 5                      | GSM878252 1 | male | 35  | unaffected | 5                        | GSM878286 1 | female | 35  | unaffected |
| 6                      | GSM878239 1 | male | 35  | unaffected | 6                        | GSM878260 1 | female | 35  | unaffected |
| 7                      | GSM878261 1 | male | 40  | unaffected | 7                        | GSM878307 1 | female | 40  | unaffected |
| 8                      | GSM878258 1 | male | 45  | unaffected | 8                        | GSM878245 1 | female | 40  | unaffected |
| 9                      | GSM878221 1 | male | 45  | unaffected | 9                        | GSM878347 1 | female | 45  | unaffected |
| 10                     | GSM878301 1 | male | 50  | unaffected | 10                       | GSM878263 1 | female | 45  | unaffected |
| 11                     | GSM878288 1 | male | 50  | unaffected | 11                       | GSM878226 1 | female | 45  | unaffected |
| 12                     | GSM878273 1 | male | 50  | unaffected | 12                       | GSM878281 1 | female | 50  | unaffected |
| 13                     | GSM878240 1 | male | 50  | unaffected | 13                       | GSM878335 1 | female | 55  | unaffected |
| 14                     | GSM878230 1 | male | 50  | unaffected | 14                       | GSM878334 1 | female | 55  | unaffected |
| 15                     | GSM878242 1 | male | 55  | unaffected | 15                       | GSM878333 1 | female | 55  | unaffected |
| 16                     | GSM878236 1 | male | 55  | unaffected | 16                       | GSM878332 1 | female | 55  | unaffected |
| 17                     | GSM878336 1 | male | 60  | unaffected | 17                       | GSM878331 1 | female | 55  | unaffected |
| 18                     | GSM878322 1 | male | 60  | unaffected | 18                       | GSM878330 1 | female | 55  | unaffected |
|                        |             |      |     |            | 19                       | GSM878345 1 | female | 70  | unaffected |

Images 2A – 2B. Unaffected Subject Subgroups, matched by age and sex.

| 2C - Bipolar (male) |             |      |     |           | 2D - Bipolar (female) |             |        |     |           |
|---------------------|-------------|------|-----|-----------|-----------------------|-------------|--------|-----|-----------|
| No                  | Sample ID   | Sex  | Age | Diagnosis | No                    | Sample ID   | Sex    | Age | Diagnosis |
| 1                   | GSM878311 1 | male | 30  | bipolar   | 1                     | GSM878344 1 | female | 25  | bipolar   |
| 2                   | GSM878231 1 | male | 30  | bipolar   | 2                     | GSM878267 1 | female | 30  | bipolar   |
| 3                   | GSM878214 1 | male | 30  | bipolar   | 3                     | GSM878284 1 | female | 35  | bipolar   |
| 4                   | GSM878356 1 | male | 35  | bipolar   | 4                     | GSM878235 1 | female | 35  | bipolar   |
| 5                   | GSM878272 1 | male | 35  | bipolar   | 5                     | GSM878243 1 | female | 40  | bipolar   |
| 6                   | GSM878229 1 | male | 35  | bipolar   | 6                     | GSM878298 1 | female | 45  | bipolar   |
| 7                   | GSM878227 1 | male | 40  | bipolar   | 7                     | GSM878271 1 | female | 45  | bipolar   |
| 8                   | GSM878289 1 | male | 45  | bipolar   | 8                     | GSM878269 1 | female | 45  | bipolar   |
| 9                   | GSM878248 1 | male | 45  | bipolar   | 9                     | GSM878339 1 | female | 50  | bipolar   |
| 10                  | GSM878329 1 | male | 50  | bipolar   | 10                    | GSM878282 1 | female | 50  | bipolar   |
| 11                  | GSM878326 1 | male | 50  | bipolar   | 11                    | GSM878278 1 | female | 50  | bipolar   |
| 12                  | GSM878264 1 | male | 50  | bipolar   | 12                    | GSM878225 1 | female | 50  | bipolar   |
| 13                  | GSM878220 1 | male | 50  | bipolar   | 13                    | GSM878270 1 | female | 55  | bipolar   |
| 14                  | GSM878342 1 | male | 55  | bipolar   | 14                    | GSM878325 1 | female | 60  | bipolar   |
| 15                  | GSM878233 1 | male | 55  | bipolar   | 15                    | GSM878244 1 | female | 60  | bipolar   |
| 16                  | GSM878255 1 | male | 60  | bipolar   | 16                    | GSM878232 1 | female | 60  | bipolar   |
| 17                  | GSM878251 1 | male | 65  | bipolar   | 17                    | GSM878266 1 | female | 65  | bipolar   |
|                     |             |      |     |           | 18                    | GSM878265 1 | female | 65  | bipolar   |

Images 2A – 2B. Bipolar Disorder patient Subgroups, matched by age and sex.

| Metric                                  | Mean estimate | 95% confidence interval | Unadjusted estimate | Base line | Statistically significant |
|-----------------------------------------|---------------|-------------------------|---------------------|-----------|---------------------------|
| Accuracy                                | 0.843         | [0.763, 0.894]          | 0.861               | 0.486     | ✓                         |
| Balanced Accuracy                       | 0.846         | [0.765, 0.903]          | 0.864               | 0.500     | ✓                         |
| F1 Score                                | 0.852         | [0.773, 0.912]          | 0.760               | NaN       | —                         |
| Matthews correlation                    | 0.619         | [0.406, 0.774]          | 0.641               | 0.000     | ✓                         |
| Precision                               | 0.906         | [0.834, 0.969]          | 0.921               | NaN       | —                         |
| True Positive Rate                      | 0.691         | [0.452, 0.834]          | 0.674               | 0.000     | ✓                         |
| Specificity                             | 0.921         | [0.850, 0.979]          | 0.931               | 1.000     | ✓                         |
| True Positives (Out-of-sample TP rate)  | 0.334         | [0.219, 0.419]          | 0.325               | 0.000     | ✓                         |
| True Negatives (Out-of-sample TN rate)  | 0.474         | [0.412, 0.538]          | 0.478               | 0.514     | —                         |
| False Positives (Out-of-sample FP rate) | 0.041         | [0.011, 0.075]          | 0.036               | 0.000     | ✓                         |
| False Negatives (Out-of-sample FN rate) | 0.152         | [0.086, 0.270]          | 0.161               | 0.486     | ✓                         |
| Average F1 Score                        | 0.873         | [0.802, 0.928]          | 0.804               | NaN       | —                         |

Image 3. Threshold Dependent metrics of the analysis.

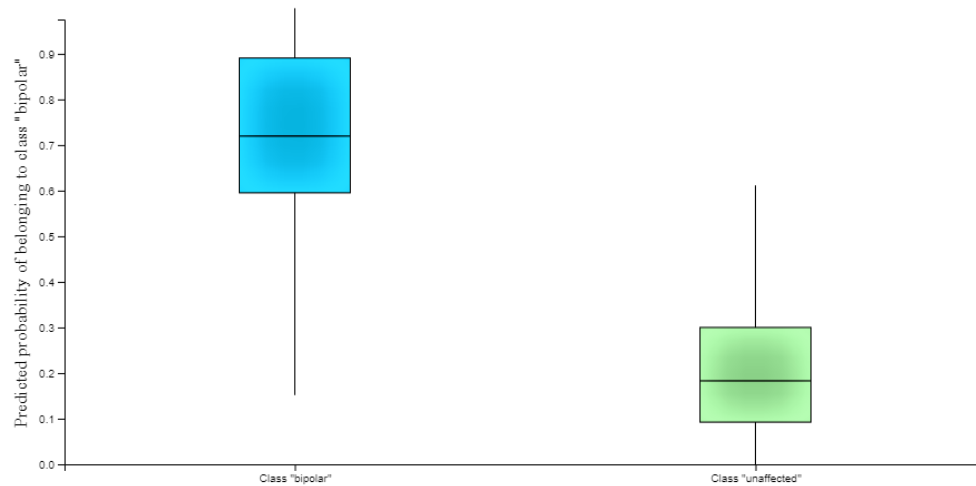

Image 4. Box Plot of the analysis.

## APPENDIX 1

### CNS functions for the genes RNU6-576P , MIR194-2 / MiR-194-5p , GDPD5

#### 1 . RNU6-576P in the CNS

(Small nuclear RNA, pseudogene)

1. Pathological Epilepsy Overexpression Cortex (mesial temporal lobe) Hippocampus [1]
2. Non-Pathological Development - 5 five postnatal years (mainly) Dorsolateral Prefrontal Cortex hypermethylation (neurons) hypomethylation (Glia) [2]
3. Possible connection to autism [3]
4. Contribution to Psychiatric-Immune Genetic Correlation (schizophrenia – Crohn's Disease) [4]

#### References for RNU6-576P in the CNS



1. Mills JD, van Vliet EA, Chen BJ, et al. Coding and non-coding transcriptome of mesial temporal lobe epilepsy: Critical role of small non-coding RNAs. *Neurobiol Dis.* 2020;134:104612. doi:10.1016/j.nbd.2019.104612
2. Price AJ, Collado-Torres L, Ivanov NA, et al. Divergent neuronal DNA methylation patterns across human cortical development reveal critical periods and a unique role of CpH methylation. *Genome Biol.* 2019;20(1):196. Published 2019 Sep 26. doi:10.1186/s13059-019-1805-1
3. Rosenfeld JA, Ballif BC, Torchia BS, et al. Copy number variations associated with autism spectrum disorders contribute to a spectrum of neurodevelopmental disorders. *Genet Med.* 2010;12(11):694-702. doi:10.1097/GIM.0b013e3181f0c5f3
4. Tylee DS, Sun J, Hess JL, et al. Genetic correlations among psychiatric and immune-related phenotypes based on genome-wide association data. *Am J Med Genet B Neuropsychiatr Genet.* 2018;177(7):641-657. doi:10.1002/ajmg.b.32652

## **2. MIR194-2 / Hsa-MiR-194-5p / MiR-194-5p in the CNS \***

(micro RNA)

1. Schizophrenia- related (in mice disease model) Downregulation Prefrontal Cortex Hippocampus [5] , [6]
2. Major Depression, Important classification feature (Patients vs Controls), Peripheral Blood [7]
3. Stress- induced Depression , differential expression (in mice disease vs control models) amygdale [8]
4. Alzheimers Disease , cmiRNA , downregulation , Cerebrospinal fluid [9]
5. Epilepsy , downregulation , serum [10] , [11]
6. Temporal lobe epilepsy , downregulation, serum [10] , [12]
7. Epilepsy (rat model) , downregulation , hippocampus [10] , [13]
8. Focal and generalized epilepsy, downregulation, serum [14] , [15]
9. Treatment Resistant Epilepsy (vs treatment responding epilepsy and healthy controls) , downregulation, serum/plasma [16] , [17]
10. Temporal lobe epilepsy (children), downregulation, peripheral blood [18]
11. Temporal lobe epilepsy (rat model), regulation of the proliferation and apoptosis of neurons in the hippocampus , neuronal cell culture [18].
12. Focal cortical dysplasia (epilepsy one of the core symptoms) , dowregulation , serum exosomes [19]
13. 22q11 Deletion Syndrome , downregulation , peripheral blood leukocytes [20]
14. lipopolysaccharide (LPS)-induced astrocytes , downregulation , cell culture [21]
15. Autism Spectrum Disorder , Upregulation , lymphoblastoid cell lines [22] , [23]

## **References for MIR194-2 / Hsa-MiR-194-5p / MiR-194-5p in the CNS**

5. Beveridge NJ, Cairns MJ. MicroRNA dysregulation in schizophrenia. *Neurobiol Dis.* 2012;46(2):263-271. doi:10.1016/j.nbd.2011.12.029

6. Stark KL, Xu B, Bagchi A, et al. Altered brain microRNA biogenesis contributes to phenotypic deficits in a 22q11-deletion mouse model. *Nat Genet.* 2008;40(6):751-760. doi:10.1038/ng.138
7. Qi B, Fiori LM, Turecki G, Trakadis YJ. Machine Learning Analysis of Blood microRNA Data in Major Depression: A Case-Control Study for Biomarker Discovery. *Int J Neuropsychopharmacol.* 2020;23(8):505-510. doi:10.1093/ijnp/pyaa029
8. Shen M, Song Z, Wang JH. microRNA and mRNA profiles in the amygdala are associated with stress-induced depression and resilience in juvenile mice. *Psychopharmacology (Berl).* 2019;236(7):2119-2142. doi:10.1007/s00213-019-05209-z
9. van den Berg MMJ, Krauskopf J, Ramaekers JG, Kleinjans JCS, Prickaerts J, Briedé JJ. Circulating microRNAs as potential biomarkers for psychiatric and neurodegenerative disorders. *Prog Neurobiol.* 2020;185:101732. doi:10.1016/j.pneurobio.2019.101732
10. Cava C, Manna I, Gambardella A, Bertoli G, Castiglioni I. Potential Role of miRNAs as Theranostic Biomarkers of Epilepsy. *Mol Ther Nucleic Acids.* 2018;13:275-290. doi:10.1016/j.omtn.2018.09.008
11. Wang J, Yu JT, Tan L, et al. Genome-wide circulating microRNA expression profiling indicates biomarkers for epilepsy. *Sci Rep.* 2015;5:9522. Published 2015 Mar 31. doi:10.1038/srep09522
12. An N, Zhao W, Liu Y, Yang X, Chen P. Elevated serum miR-106b and miR-146a in patients with focal and generalized epilepsy. *Epilepsy Res.* 2016;127:311-316. doi:10.1016/j.eplepsyres.2016.09.019
13. Li MM, Jiang T, Sun Z, et al. Genome-wide microRNA expression profiles in hippocampus of rats with chronic temporal lobe epilepsy. *Sci Rep.* 2014;4:4734. Published 2014 Apr 22. doi:10.1038/srep04734
14. Wang J, Zhao J. MicroRNA Dysregulation in Epilepsy: From Pathogenetic Involvement to Diagnostic Biomarker and Therapeutic Agent Development. *Front Mol Neurosci.* 2021;14:650372. Published 2021 Mar 12. doi:10.3389/fnmol.2021.650372
15. An N, Zhao W, Liu Y, Yang X, Chen P. Elevated serum miR-106b and miR-146a in patients with focal and generalized epilepsy. *Epilepsy Res.* 2016;127:311-316. doi:10.1016/j.eplepsyres.2016.09.019
16. Tiwari D, Peariso K, Gross C. MicroRNA-induced silencing in epilepsy: Opportunities and challenges for clinical application. *Dev Dyn.* 2018;247(1):94-110. doi:10.1002/dvdy.24582
17. Wang J, Tan L, Tan L, et al. Circulating microRNAs are promising novel biomarkers for drug-resistant epilepsy. *Sci Rep.* 2015;5:10201. Published 2015 May 18. doi:10.1038/srep10201
18. Niu X, Zhu HL, Liu Q, Yan JF, Li ML. MiR-194-5p serves as a potential biomarker and regulates the proliferation and apoptosis of hippocampus neuron in children with temporal lobe epilepsy. *J Chin Med Assoc.* 2021;84(5):510-516. doi:10.1097/JCMA.0000000000000518
19. Chen SD, Pan HY, Huang JB, et al. Circulating MicroRNAs from Serum Exosomes May Serve as a Putative Biomarker in the Diagnosis and Treatment of Patients with Focal

- Cortical Dysplasia. *Cells*. 2020;9(8):1867. Published 2020 Aug 10. doi:10.3390/cells9081867
20. Sellier C, Hwang VJ, Dandekar R, et al. Decreased DGCR8 expression and miRNA dysregulation in individuals with 22q11.2 deletion syndrome. *PLoS One*. 2014;9(8):e103884. Published 2014 Aug 1. doi:10.1371/journal.pone.0103884
  21. Wang M, Li Z, Zuo Q. miR-194-5p inhibits LPS-induced astrocytes activation by directly targeting neurexophilin 1. *Mol Cell Biochem*. 2020;471(1-2):203-213. doi:10.1007/s11010-020-03780-0
  22. Im HI, Kenny PJ. MicroRNAs in neuronal function and dysfunction. *Trends Neurosci*. 2012;35(5):325-334. doi:10.1016/j.tins.2012.01.004
  23. Sarachana T, Zhou R, Chen G, Manji HK, Hu VW. Investigation of post-transcriptional gene regulatory networks associated with autism spectrum disorders by microRNA expression profiling of lymphoblastoid cell lines. *Genome Med*. 2010;2(4):23. Published 2010 Apr 7. doi:10.1186/gm144

### 3. GDPD5 in the CNS

1. Treatment Responsive Schizophrenia , Upregulation , Blood Plasma , Unknown Mechanism [24]
2. Schizophrenia , Hypomethylation , Superior Frontal Gyrus , Tissue , DNA methylation [25]
3. Epilepsy / Status Epilepticus (mouse model) , Upregulation, Hippocampus , Post-mortem , RNA expression [26]
4. Tissue samples (healthy subjects), healthy gene expression identification, human brain, hydrolysis of deacylated glycerophospholipids to glycerol phosphate and alcohol, overexpression leads to suppression of SRE-mediated transcriptional activation/ possible negative regulation role in MAPK signaling pathway.

### References for GDPD5 in the CNS

24. Martins-de-Souza D, Solari FA, Guest PC, Zahedi RP, Steiner J. Biological pathways modulated by antipsychotics in the blood plasma of schizophrenia patients and their association to a clinical response. *NPJ Schizophr*. 2015;1:15050. Published 2015 Dec 9. doi:10.1038/npjSchz.2015.50
25. (Preprint) McKinney BC, Hensler CM, Wei Y, Lewis DA, Wang J, Ding Y , Sweet RA. Schizophrenia-associated differential DNA methylation in the superior temporal gyrus is distributed to many sites across the genome and annotated by the risk gene *MAD1L1*. medRxiv 2020.08.02.20166777. Posted 2020 August 4. doi: 10.1101/2020.08.02.20166777
26. Hansen KF, Sakamoto K, Pelz C, Impey S, Obrietan K. Profiling status epilepticus-induced changes in hippocampal RNA expression using high-throughput RNA sequencing. *Sci Rep*. 2014;4:6930. Published 2014 Nov 6. doi:10.1038/srep06930
27. Lang Q, Zhang H, Li J, et al. Cloning and characterization of a human GDPD domain-containing protein GDPD5. *Mol Biol Rep*. 2008;35(3):351-359. doi:10.1007/s11033-007-9093-3



28. Matas-Rico E, van Veen M, Leyton-Puig D, et al. Glycerophosphodiesterase GDE2 Promotes Neuroblastoma Differentiation through Glypican Release and Is a Marker of Clinical Outcome [published correction appears in *Cancer Cell*. 2016 Dec 12;30(6):986]. *Cancer Cell*. 2016;30(4):548-562. doi:10.1016/j.ccell.2016.08.016
29. Cave C, Park S, Rodriguez M, et al. GDE2 is essential for neuronal survival in the postnatal mammalian spinal cord. *Mol Neurodegener*. 2017;12(1):8. Published 2017 Jan 19. doi:10.1186/s13024-017-0148-1
30. Park S, Lee C, Sabharwal P, Zhang M, Meyers CL, Sockanathan S. GDE2 promotes neurogenesis by glycosylphosphatidylinositol-anchor cleavage of RECK. *Science*. 2013;339(6117):324-328. doi:10.1126/science.1231921
31. Yanaka N, Nogusa Y, Fujioka Y, Yamashita Y, Kato N. Involvement of membrane protein GDE2 in retinoic acid-induced neurite formation in Neuro2A cells. *FEBS Lett*. 2007;581(4):712-718. doi:10.1016/j.febslet.2007.01.035
32. Rao M, Sockanathan S. Transmembrane protein GDE2 induces motor neuron differentiation in vivo. *Science*. 2005;309(5744):2212-2215. doi:10.1126/science.1117156
33. Sabharwal P, Lee C, Park S, Rao M, Sockanathan S. GDE2 regulates subtype-specific motor neuron generation through inhibition of Notch signaling. *Neuron*. 2011;71(6):1058-1070. doi:10.1016/j.neuron.2011.07.028
34. Poplawski SG. The Regulation of Gene Expression During Memory Consolidation in the Hippocampus. Dissertation. University of Pennsylvania. 2014. Accessed October 20, 2021. <https://repository.upenn.edu/edissertations/1408/>
35. Wang X, Wang H, Figueroa BE, et al. Dysregulation of receptor interacting protein-2 and caspase recruitment domain only protein mediates aberrant caspase-1 activation in Huntington's disease. *J Neurosci*. 2005;25(50):11645-11654. doi:10.1523/JNEUROSCI.4181-05.2005
36. Shelton RC, Claiborne J, Sidoryk-Wegrzynowicz M, et al. Altered expression of genes involved in inflammation and apoptosis in frontal cortex in major depression. *Mol Psychiatry*. 2011;16(7):751-762. doi:10.1038/mp.2010.52

\* Hsa-MiR-194-5p is an alias of both Mir-194-1 and Mir-194-2.

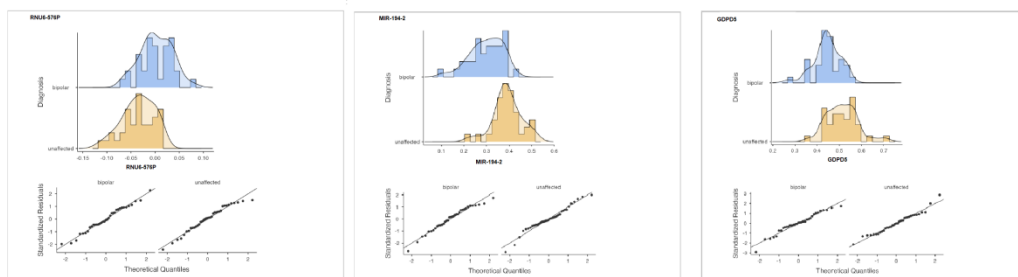

Image 5. Welsh t- test for RNU-576P, MIR194-2, GDPD5 expression differences between BD patients and Unaffected Controls.

## SI-Appendix 2

### JADBio Description of Performed Analysis

[Visit analysis](#)

#### Setup

JADBio version **1.4.14** ran on dataset **GSE35978\_BDHC\_CEREBELLUM\_homog\_nocontrols** with **72** samples and **28869** features to create a predictive model for outcome named **Diagnosis**. The outcome was discrete leading to a **classification** modeling.

The preferences of the analysis were set to **true** for feature selection and **false** for full feature models tried.

The **AUC** metric was used to optimize for the best model.

The maximum number of features to select was set to **25**.

The effort to spend on tuning the algorithms were set to **Extensive**.

The number of CPU cores to use for the analysis was set to **1**.

The execution time was **02:16:25**.

### Configuration Space

JADBio's AI decide to try the following algorithms and tuning hyper-parameter values:

| Algorithm Type    | Algorithm                                              | Hyper-parameter | Set of Values                       |
|-------------------|--------------------------------------------------------|-----------------|-------------------------------------|
| Preprocessing     | Contant Removal                                        |                 |                                     |
|                   | Standardization                                        |                 |                                     |
| Feature Selection | Test-Budgeted Statistically Equivalent Signature (SES) | alpha           | 0.05, 0.1, 0.01                     |
|                   |                                                        | maxk            | 3, 2                                |
|                   | LASSO                                                  | penalties       | 1.25, 2.0, 0.0, 0.25, 1.0, 1.5, 0.5 |
| Modeling          | Linear Support Vector Machines                         | costs           | 0.1, 1.0, 0.001, 100.0, 10.0, 0.01  |
|                   | Polynomial Support Vector Machines                     | gammas          | 1.0, 0.001, 0.1, 0.01, 10.0, 100.0  |
|                   |                                                        | costs           | 0.1, 1.0, 0.001, 100.0, 10.0, 0.01  |
|                   |                                                        | degrees         | 4, 2, 3                             |

| Algorithm Type | Algorithm                   | Hyper-parameter   | Set of Values                                                                                                              |
|----------------|-----------------------------|-------------------|----------------------------------------------------------------------------------------------------------------------------|
|                | RBF Support Vector Machines | gammas            | 1.0, 0.001, 0.1, 0.01, 10.0, 100.0                                                                                         |
|                |                             | costs             | 0.1, 1.0, 0.001, 100.0, 10.0, 0.01                                                                                         |
|                | Logistic Regression         | lambdas           | 1.0, 0.001, 0.01, 100.0, 10.0, 0.1, 1.0E-4                                                                                 |
|                | Random Forests              | min leaf sizes    | 1, 4, 3, 5, 2                                                                                                              |
|                |                             | vars to split     | 0.816 sqrt ( nvars ), 1.0 sqrt ( nvars ), 1.291 sqrt ( nvars ), 0.577 sqrt ( nvars ), sqrt ( nvars ), 1.154 sqrt ( nvars ) |
|                |                             | splits to perform | 1.0                                                                                                                        |
|                |                             | ntrees            | 1000, 100                                                                                                                  |
|                | Decision Tree               | min leaf sizes    | 2, 1, 4, 3, 5                                                                                                              |
|                |                             | vars to split     | nvars // 1.0                                                                                                               |
|                |                             | splits to perform | 1.0                                                                                                                        |
|                |                             | alphas            | 0.1, 0.05, 0.01                                                                                                            |

This process led to **3017** combinations and corresponding configurations (machine learning pipelines) to try.

#### Configuration Estimation Protocol

JADBio’s AI system decided to estimate the out-of-sample performance of the models produced by each configuration using **Repeated 10-fold CV without dropping (max. repeats = 20)**. Overall, 3017 configurations × 20 repeats × 10 folds = 603400 models were set out to train. Out of those, only 211190 models were eventually trained, as JADBio stopped all configuration evaluations when it deemed that no sufficient progress was made. JADBio **did not use** the Early Dropping criterion.
